# Supplementary material for: Computer-Aided Diagnosis of Melanoma Subtypes Using Reflectance Confocal Images
Source: MDPI journal article supplement (doi:10.3390/cancers15051428), 2023-02-23
Supplement: s1 [file s1]

# Supplementary Table 1

**A.** Hyper-parameter settings used to train deep learning models studied.

| <i>Deep Learning model</i> | <i>Epochs</i> | <i>Batch Size</i> | <i>Optimizer</i> | <i>Lr</i> |
|----------------------------|---------------|-------------------|------------------|-----------|
| <i>DenseNet169</i>         | 100           | 15                | Adam             | 0.001     |
| <i>ResNet50</i>            | 100           | 10                | RMSProp          | 2e-5      |
| <i>ResNet101</i>           | 100           | 15                | Adam             | 0.01      |
| <i>6 Layer CNN</i>         | 50            | 10                | RMSProp          | 0.001     |
| <i>Inception V3</i>        | 100           | 10                | Adam             | 0.01      |
| <i>MLP</i>                 | 50            | 10                | Adam             | 0.01      |
| <i>Vgg16</i>               | 50            | 10                | Adam             | 0.001     |

**B.** Hyper-parameter settings used to traditional machine learning models trained using features derived from ResNet101.

| <i>Feature selection method</i>                            | <i>ML method</i> | <i>Parameters used</i>                                                                                                                                                                                                                      | <i>ROC_AUC</i> |
|------------------------------------------------------------|------------------|---------------------------------------------------------------------------------------------------------------------------------------------------------------------------------------------------------------------------------------------|----------------|
| <i>ResNet101 for Feature Vector (For the best results)</i> | <b>RF</b>        | n_estimators=10, criterion='gini', max_depth=None, min_samples_split=2, min_samples_leaf=1, min_weight_fraction_leaf=0.0, max_features='auto', max_leaf_nodes=None, bootstrap=True, oob_score=False, n_jobs=1, random_state=None, verbose=0 | AUC = 0.603    |
|                                                            | <b>AdaBoost</b>  | base_estimator=None, n_estimators=500, learning_rate=0.1                                                                                                                                                                                    | AUC = 0.681    |
|                                                            | <b>SVM</b>       | gamma='scale', class_weight='balanced', probability = True, kernel = ['linear', 'poly', 'rbf', 'sigmoid', 'poly']                                                                                                                           | AUC = 0.681    |
|                                                            | <b>KNN</b>       | n_neighbors = 5<br>metric = 'minkowski', p = 2                                                                                                                                                                                              | AUC = 0.611    |
